# Supplementary material for: Physical properties of secondary photochemical aerosol from OH oxidation of a cyclic siloxane
Source: Copernicus journal article supplement (doi:10.5194/acp-19-1649-2019), 2019-02-08
Supplement: Supplementary file 1 [file acp-19-1649-2019-supplement.pdf]

Supplement of Atmos. Chem. Phys., 19, 1649–1664, 2019  
<https://doi.org/10.5194/acp-19-1649-2019-supplement>  
© Author(s) 2019. This work is distributed under  
the Creative Commons Attribution 4.0 License.

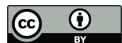

*Supplement of*

## **Physical properties of secondary photochemical aerosol from OH oxidation of a cyclic siloxane**

**Nathan J. Janecek et al.**

*Correspondence to:* Charles O. Stanier ([charles-stanier@uiowa.edu](mailto:charles-stanier@uiowa.edu))

The copyright of individual parts of the supplement might differ from the CC BY 4.0 License.

## Table of Contents

|                                                                       |    |
|-----------------------------------------------------------------------|----|
| Section S1: General information.....                                  | 1  |
| Table S1 .....                                                        | 1  |
| Figure S1 .....                                                       | 2  |
| Figure S2.....                                                        | 2  |
| Section S2: D <sub>5</sub> gas sampling quality control results ..... | 3  |
| Section S3: D <sub>5</sub> gas sampling details.....                  | 3  |
| Table S2 .....                                                        | 3  |
| Figure S3.....                                                        | 4  |
| Table S3 .....                                                        | 5  |
| Figure S4.....                                                        | 6  |
| Section S4: Particle loss correction.....                             | 7  |
| Figure S5.....                                                        | 7  |
| Figure S6.....                                                        | 8  |
| Table S4 .....                                                        | 8  |
| Figure S7.....                                                        | 9  |
| Section S5: Yield sensitivity .....                                   | 14 |
| Figure S8.....                                                        | 14 |
| Section S6: Condensational sink input .....                           | 15 |
| Table S5 .....                                                        | 15 |
| Section S7: Hygroscopicity.....                                       | 16 |
| Figure S9.....                                                        | 16 |
| Figure S10.....                                                       | 16 |
| Figure S11.....                                                       | 18 |
| Figure S12.....                                                       | 20 |
| Table S6 .....                                                        | 21 |
| Section S8: Volatility.....                                           | 22 |
| Table S7 .....                                                        | 22 |
| Figure S13.....                                                       | 23 |
| Figure S14.....                                                       | 24 |
| References.....                                                       | 25 |

## Section S1: General information

**Table S1:** Experiments performed, chamber settings, and analysis methods for the generation and characterization of cVMS secondary aerosol.

| Flow (LPM) | Ring Flow (LPM) | RH (%) | Water Bath (°C) | Lights (%) | Purpose                                                                                                  | Analysis                                      | Notes                |
|------------|-----------------|--------|-----------------|------------|----------------------------------------------------------------------------------------------------------|-----------------------------------------------|----------------------|
| 3.5        | 1               | 45     | 70              | 80         | Yield 1                                                                                                  | SMPS, D <sub>5</sub> gas, SO <sub>2</sub> gas | SMPS far             |
| 3.5        | 1               | 25     | 60              | 80         | Yield 2                                                                                                  | SMPS, D <sub>5</sub> gas, SO <sub>2</sub> gas | SMPS near            |
| 5          | 3               | 25     | 70              | 80         | Yield 3                                                                                                  | SMPS, D <sub>5</sub> gas, SO <sub>2</sub> gas | SMPS far             |
| 3.5        | 1               | 45     | 60              | 100        | Yield 4                                                                                                  | SMPS, D <sub>5</sub> gas, SO <sub>2</sub> gas | SMPS far             |
| 5          | 3               | 25     | 60              | 100        | Yield 5                                                                                                  | SMPS, D <sub>5</sub> gas, SO <sub>2</sub> gas | SMPS near            |
| 3.5        | 1               | 25     | 50              | 80         | Seed test                                                                                                | SMPS                                          |                      |
| 3.5        | 1               | 25     | 60              | off        | QC test - D <sub>5</sub> chamber test to verify photochemical reaction the source of D <sub>5</sub> loss | SMPS, D <sub>5</sub> gas                      |                      |
| 3.5        | 1               | 25     | 70              | off        | QC test - SPE cartridge breakthrough                                                                     | D <sub>5</sub> gas                            | Tested upstream only |
| -          | -               | -      | -               | -          | Ammonium sulfate CCN calibration                                                                         | DMT-CCN, CPC                                  |                      |
| 5          | 3               | 30     | 70              | 100        | cVMS CCN measurement                                                                                     | DMT-CCN, CPC                                  |                      |
| 5          | 3               | 30     | -               | 100        | Antiperspirant oxidation test 1                                                                          | SMPS                                          |                      |
| 5          | 3               | 30     | -               | 100        | Antiperspirant oxidation test 2                                                                          | SMPS, TPS100                                  |                      |
| 5          | 3               | 30     | -               | 100        | Hair conditioner oxidation test 1                                                                        | SMPS                                          |                      |
| 5          | 3               | 30     | 70              | 100        | Volatility measurement                                                                                   | SMPS, V-TDMA                                  |                      |
| -          | -               | -      | -               | -          | Heating of D <sub>5</sub> vapor to 100 - 250°C                                                           | SMPS                                          |                      |
| -          | -               | -      | -               | -          | Heating of D <sub>5</sub> vapor to 550°C                                                                 | SMPS                                          |                      |
| -          | -               | -      | -               | -          | Heating of D <sub>5</sub> vapor to 550°C and 80 nm ammonium sulfate seed aerosols                        | SMPS                                          |                      |

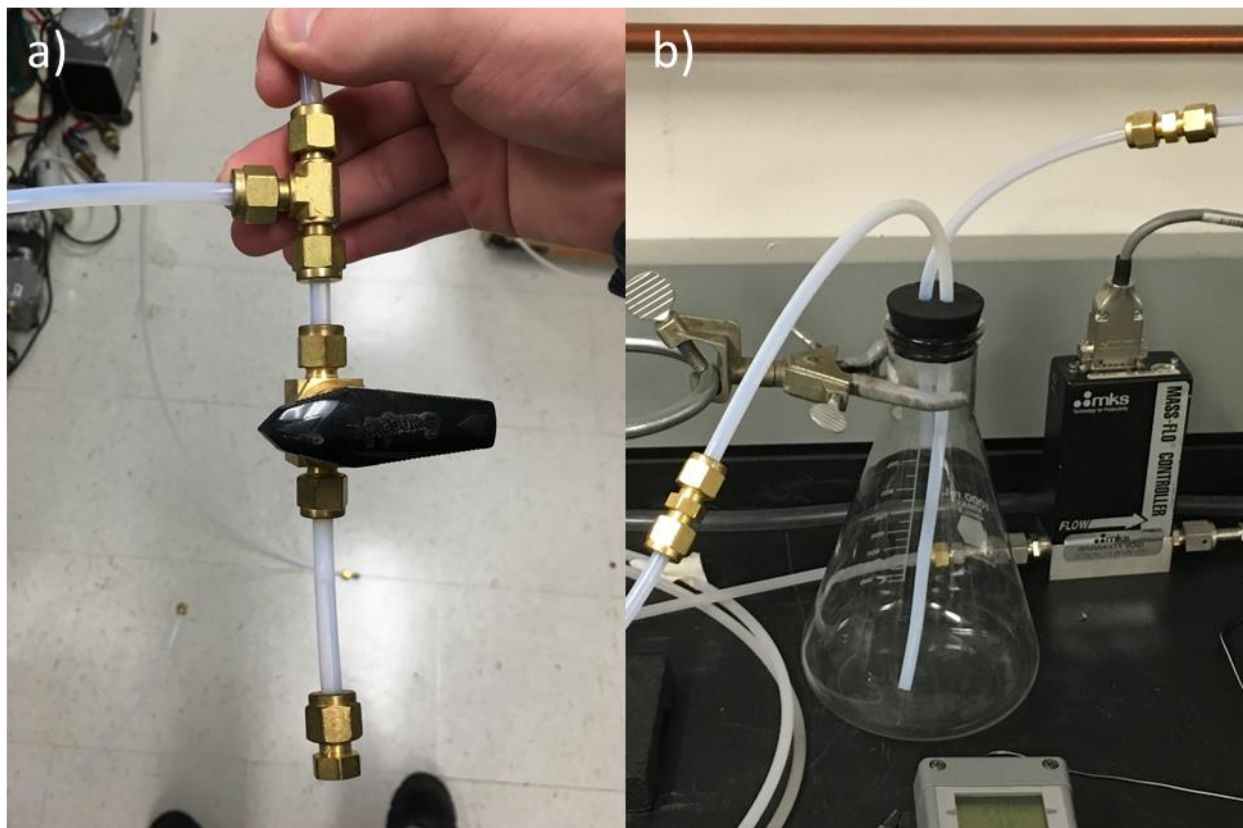

**Figure S1:** Cyclic siloxane delivery for a) liquid D<sub>5</sub> diffusion and b) flowing air past personal care product.

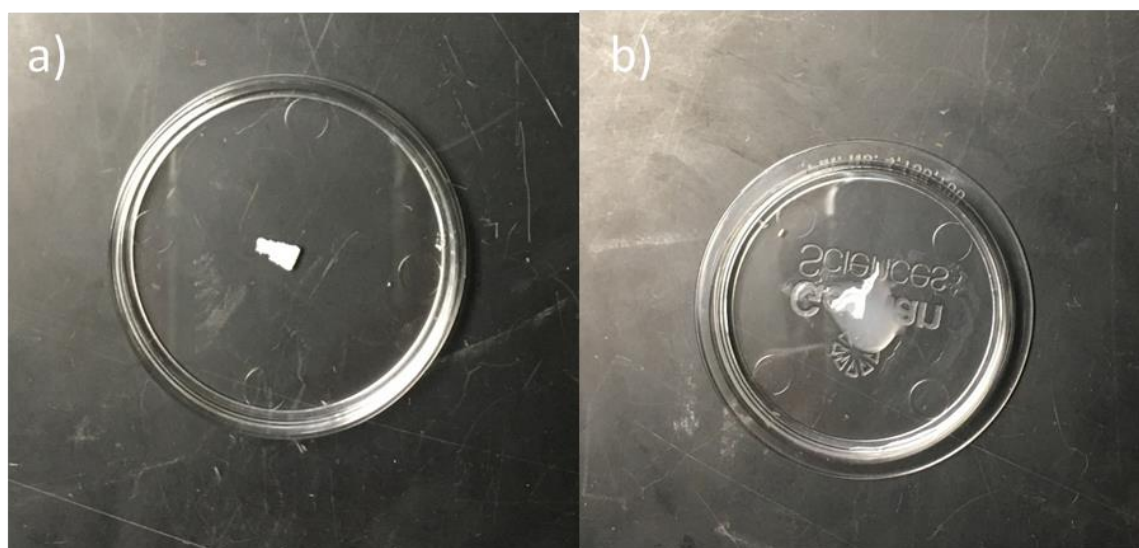

**Figure S2:** Representative amounts of personal care product placed in flask for cyclic siloxane delivery. Panel a) ~10 mg antiperspirant, and b) ~25 mg hair conditioner. Air was passed through the flask and fed into the OFR.

## Section S2: D<sub>5</sub> gas sampling quality control results

Sufficient elution volume was tested by collecting a second cartridge elution of 1.5 mL for the sample with the highest anticipated concentration. Mass in the second elution was negligible compared to the primary elution (2.5% and 1.9% in duplicate testing). A cartridge breakthrough test was performed under the highest anticipated concentration sampling conditions, where a backup cartridge was connected behind the primary cartridge in the sampling setup. The backup cartridge was eluted into a separate GC vial and analyzed. Mass on the backup cartridge was negligible compared to the primary cartridge (0.6% in both duplicates).

Quality Control was assessed through a blank spike test; duplicates; and field, instrument, and method blanks. In the blank spike test, cleaned sample cartridges were spiked with D<sub>5</sub> and eluted with hexane to determine D<sub>5</sub> recovery from cartridges. Recoveries were 96% and 97% in duplicate testing. Duplicate samples and blanks were collected and analyzed. Relative percent difference ranged from 1 to 7% in the method blank duplicates, 1 to 13% in the field blank duplicates, 1 to 3% for the upstream sample duplicates, and 1 to 21% for the downstream sample duplicates. Contamination during sample deployment and handling in the field was monitored by analyzing field blanks. Mass on the field blanks ranged from 9 to 56 ng per blank. Contamination from glassware, cartridges, and solvents was monitored by analyzing method blanks which consisted of cleaned sample cartridges stored in a clean media fridge until analysis. Two method blanks per yield test were run through the extraction process in parallel with the samples. Mass on the method blanks ranged from 10 to 67 ng. Samples were not blank corrected.

## Section S3: D<sub>5</sub> gas sampling details

**Table S2:** GC and MS parameters for D<sub>5</sub> gas concentration quantification.

|               |                |                                                             |
|---------------|----------------|-------------------------------------------------------------|
| GC parameters | Injector       | 3 washes in DCM, 3 washes in hexane pre- and post-injection |
|               |                | 3 sample pumps                                              |
|               |                | Fast plunger speed                                          |
|               |                | Injection volume 2 µL with a 10 µL syringe                  |
|               | Oven Program   | Initial temperature 60 °C, hold 2 min                       |
|               |                | Rate 20 °C/min to final temp 250 °C, hold 5 min             |
|               |                | Total run time 16.5 min                                     |
|               |                | Flow 0.8 mL/min                                             |
|               | Inlet          | Helium carrier gas                                          |
|               |                | Splitless mode                                              |
|               |                | Temperature 200 °C                                          |
|               |                | Pressure 5.3 psi                                            |
|               |                | Purge flow 50 mL/min, purge time 1 min, flow 53.6 mL/min    |
|               |                | Gas saver 20 mL/min, saver time 2 min                       |
|               |                | 3 min solvent delay                                         |
|               | Transfer line  | Temperature 280 °C                                          |
|               | Post run       | 5 min at 60 °C                                              |
| MS parameters | temperatures   | MS source 250 °C, MS quad 150 °C                            |
| SIM mode      | Ions monitored | 355 (D <sub>5</sub> ) and 258 (PCB 30)                      |

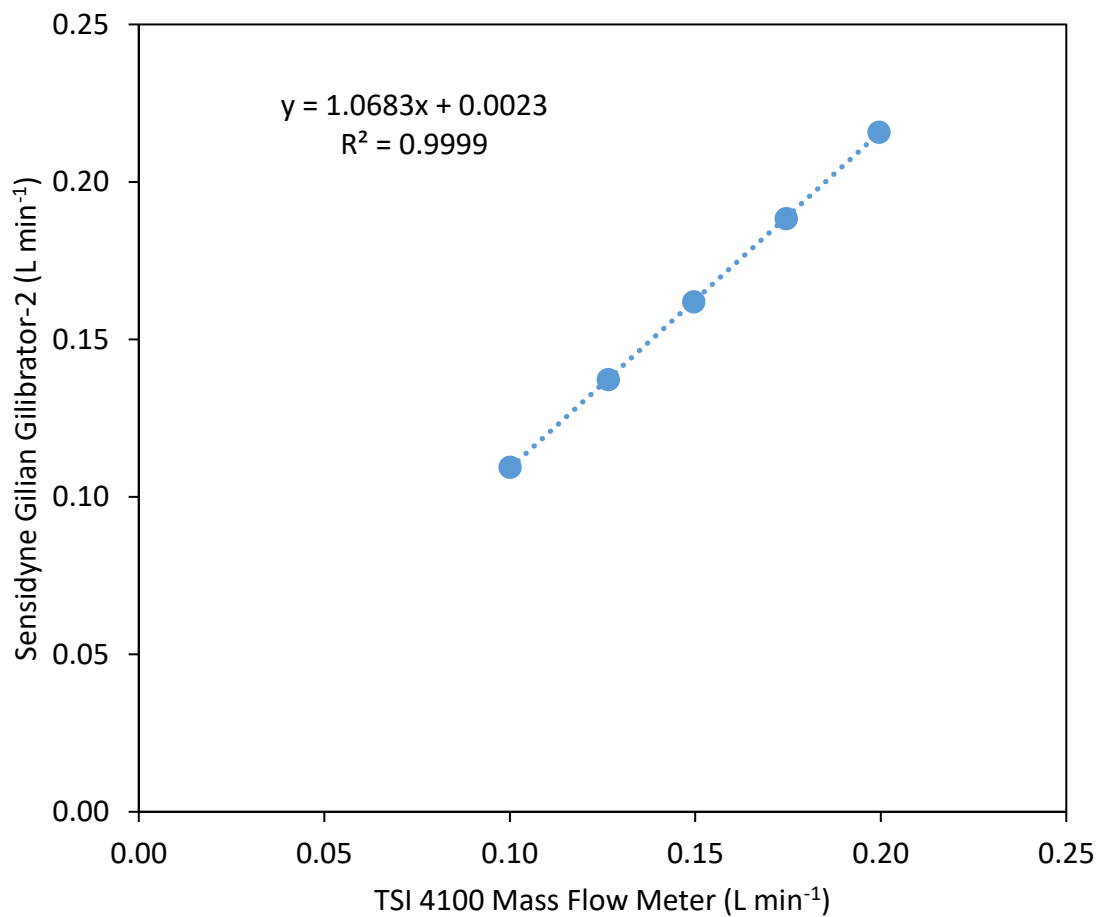

**Figure S3:** Calibration fit used to convert measured mass flow (TSI 4100) to volumetric flow for D<sub>5</sub> gas sampling. The volumetric flow was determined using a Sensidyne Gillian Gilibrator-2.

**Table S3:** D<sub>5</sub> gas sampling details. Samples with D<sub>5</sub> measured upstream of the OFR chamber are labeled “US”, concentrations measured downstream of the reactor are labeled “DS”. The label “P” and “B” refer to primary and backup cartridges, respectively. The reported flowrates are the calibrated volumetric flow rates.

| Test         | Sample | Sampling Time (min) | Average Flowrate (L min <sup>-1</sup> ) | Total Volume (L) | Measured D <sub>5</sub> (ng) | D <sub>5</sub> Concentration (μg m <sup>-3</sup> ) |
|--------------|--------|---------------------|-----------------------------------------|------------------|------------------------------|----------------------------------------------------|
| Breakthrough | US1P   | 20.2                | 0.161                                   | 3.24             | 2619.3                       | 808.2                                              |
| Breakthrough | US2P   | 20.6                | 0.159                                   | 3.27             | 2645.3                       | 809.3                                              |
| Breakthrough | US1B   | 20.2                | 0.161                                   | 3.24             | 15.3                         | 4.7                                                |
| Breakthrough | US2B   | 20.6                | 0.159                                   | 3.27             | 14.8                         | 4.5                                                |
| Chamber Test | US1    | 20.0                | 0.162                                   | 3.24             | 1421.3                       | 439.1                                              |
| Chamber Test | US2    | 20.0                | 0.162                                   | 3.23             | 1387.5                       | 429.3                                              |
| Chamber Test | DS1    | 20.0                | 0.163                                   | 3.25             | 1400.7                       | 430.4                                              |
| Chamber Test | DS2    | 20.0                | 0.163                                   | 3.25             | 1387.0                       | 426.4                                              |
| Yield 1      | US1    | 20.0                | 0.162                                   | 3.25             | 2399.5                       | 739.2                                              |
| Yield 1      | US2    | 20.0                | 0.163                                   | 3.26             | 2413.4                       | 740.7                                              |
| Yield 1      | DS1    | 20.0                | 0.167                                   | 3.33             | 54.9                         | 16.5                                               |
| Yield 1      | DS2    | 20.0                | 0.166                                   | 3.32             | 44.4                         | 13.4                                               |
| Yield 2      | US1    | 20.0                | 0.164                                   | 3.28             | 1210.2                       | 369.5                                              |
| Yield 2      | US2    | 20.0                | 0.164                                   | 3.28             | 1243.7                       | 378.8                                              |
| Yield 2      | DS1    | 20.0                | 0.164                                   | 3.28             | 59.3                         | 18.1                                               |
| Yield 2      | DS2    | 20.0                | 0.164                                   | 3.28             | 58.7                         | 17.9                                               |
| Yield 3      | US1    | 20.0                | 0.165                                   | 3.30             | 1628.4                       | 493.8                                              |
| Yield 3      | US2    | 20.0                | 0.164                                   | 3.28             | 1679.4                       | 511.3                                              |
| Yield 3      | DS1    | 20.0                | 0.162                                   | 3.24             | 68.0                         | 21.0                                               |
| Yield 3      | DS2    | 20.0                | 0.161                                   | 3.23             | 78.2                         | 24.2                                               |
| Yield 4      | US1    | 20.2                | 0.163                                   | 3.29             | 1246.3                       | 378.9                                              |
| Yield 4      | US2    | 20.2                | 0.161                                   | 3.26             | 1207.6                       | 370.8                                              |
| Yield 4      | DS1    | 20.2                | 0.159                                   | 3.21             | 55.9                         | 17.4                                               |
| Yield 4      | DS2    | 20.1                | 0.158                                   | 3.16             | 48.6                         | 15.4                                               |
| Yield 5      | US1    | 20.0                | 0.162                                   | 3.25             | 929.1                        | 286.1                                              |
| Yield 5      | US2    | 20.0                | 0.162                                   | 3.25             | 954.9                        | 294.1                                              |
| Yield 5      | DS1    | 20.0                | 0.166                                   | 3.31             | 32.5                         | 9.8                                                |
| Yield 5      | DS2    | 20.0                | 0.164                                   | 3.28             | 30.7                         | 9.4                                                |

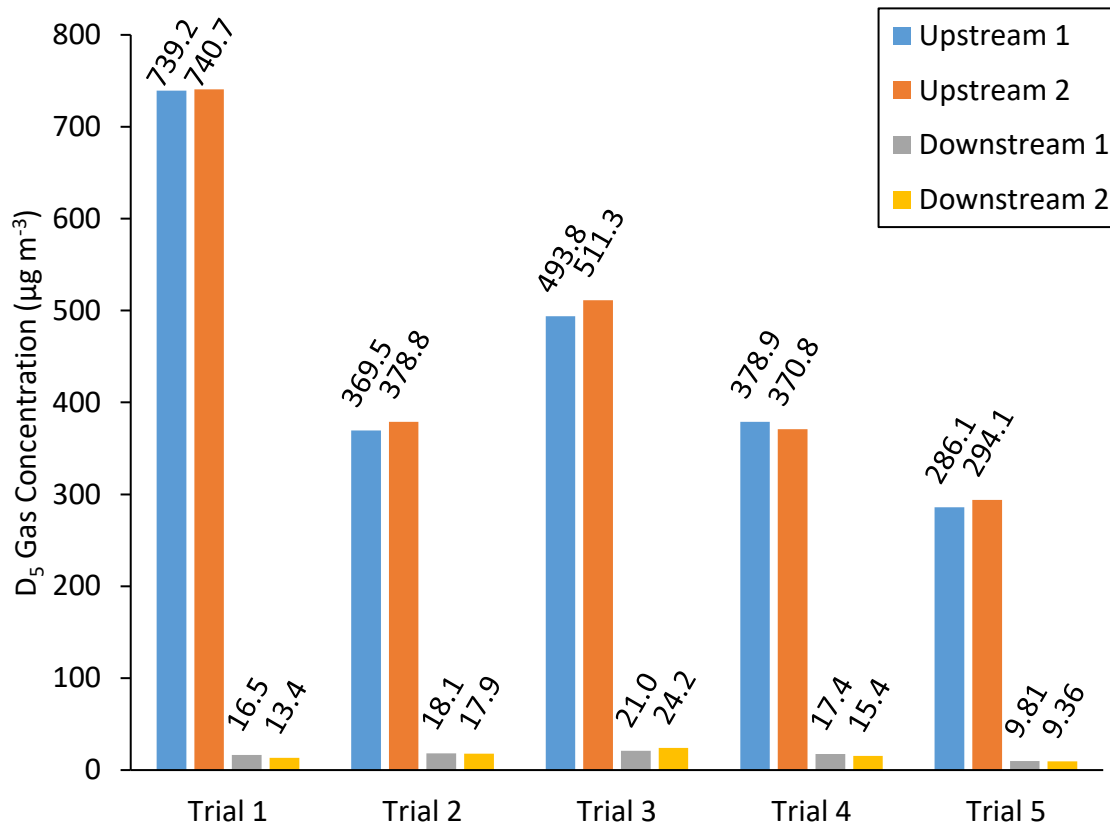

**Figure S4:** D<sub>5</sub> gas concentrations (µg m<sup>-3</sup>) were quantified upstream and downstream of the OFR using SPE cartridges. Upstream 1 and 2, and downstream 1 and 2 refer to the duplicate trials.



## Section S4: Particle loss correction

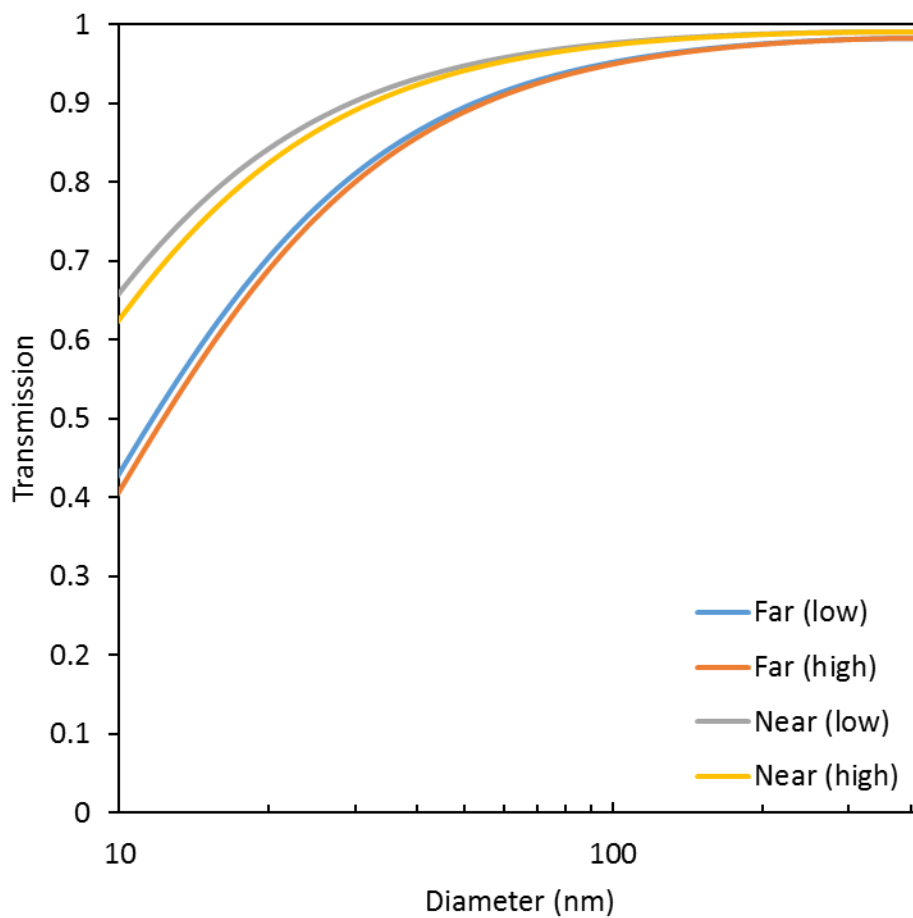

**Figure S5:** Modeled particle transmission for configurations with  $D_5$  gas sampling. Far and near refer to SMPS placement relative to the OFR. Low and high refers to the incoming total flow of  $3.5 \text{ L min}^{-1}$  or  $5 \text{ L min}^{-1}$ , respectively.

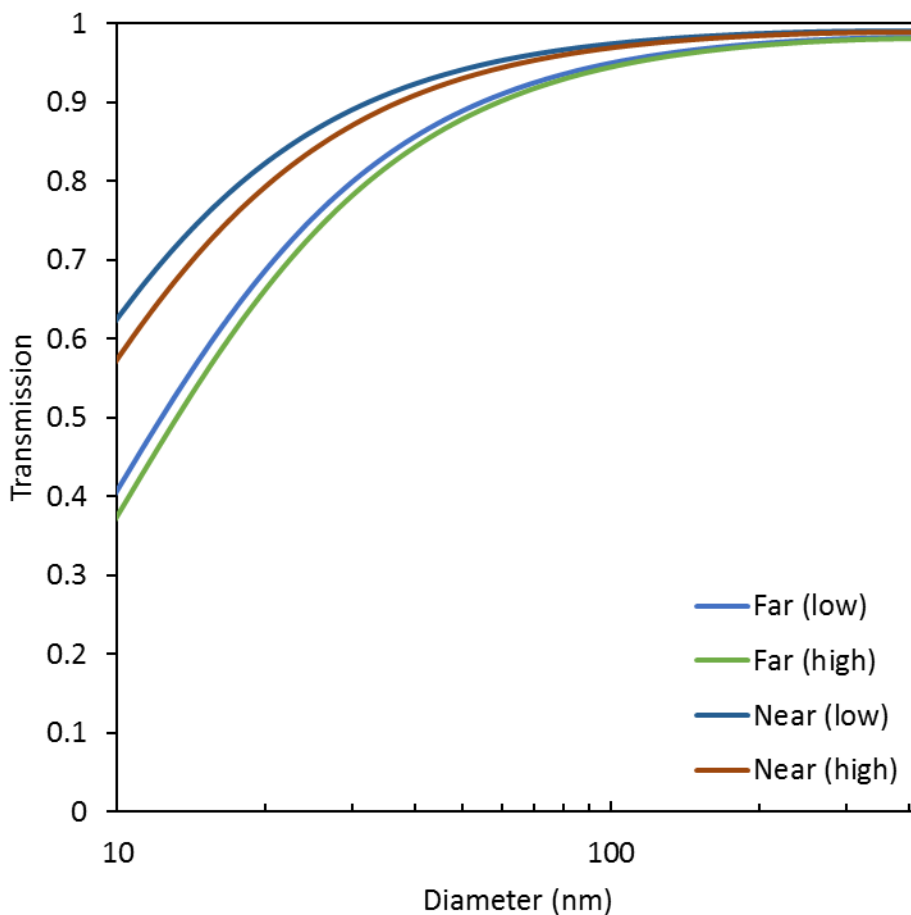

**Figure S6:** Modeled particle transmission for configurations with SO<sub>2</sub> gas sampling. Far and near refer to SMPS placement relative to the OFR. Low and high refers to the incoming total flow of 3.5 L min<sup>-1</sup> or 5 L min<sup>-1</sup>, respectively.

**Table S4:** List of corresponding SMPS placement and flow conditions for particle transmission correction.

| Yield Test | SMPS Placement | Flow |
|------------|----------------|------|
| 1          | Far            | Low  |
| 2          | Near           | Low  |
| 3          | Far            | High |
| 4          | Far            | Low  |
| 5          | Near           | High |

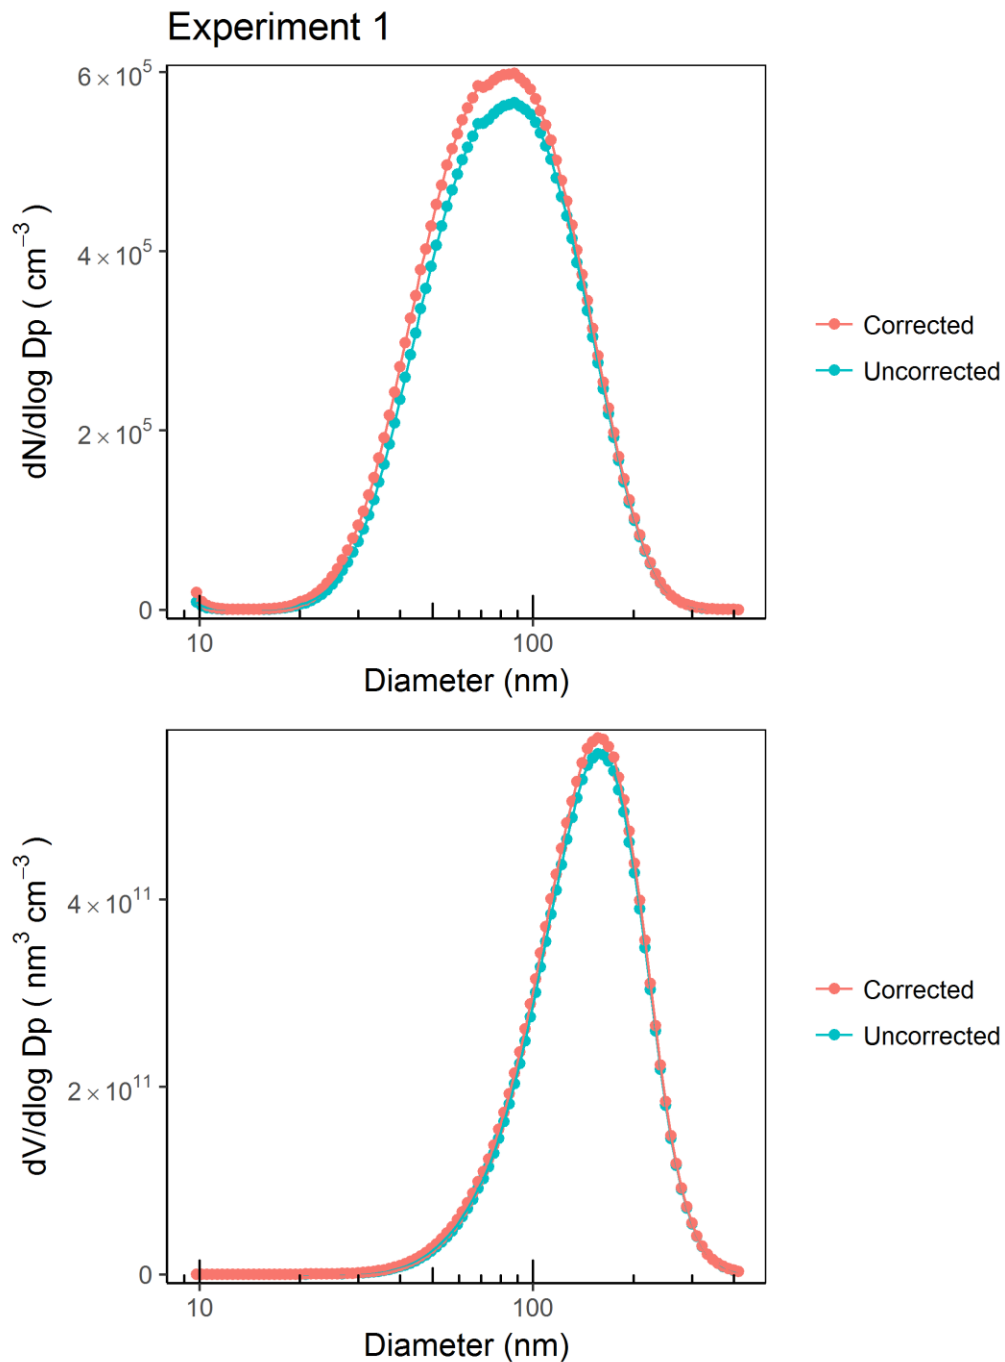

**Figure S7:** SMPS measured average number and volume  $D_5$  oxidation aerosol size distributions for the yield experiment period. Corrected distributions are corrected for modeled particle losses in the denuders and tubing.

### Experiment 2

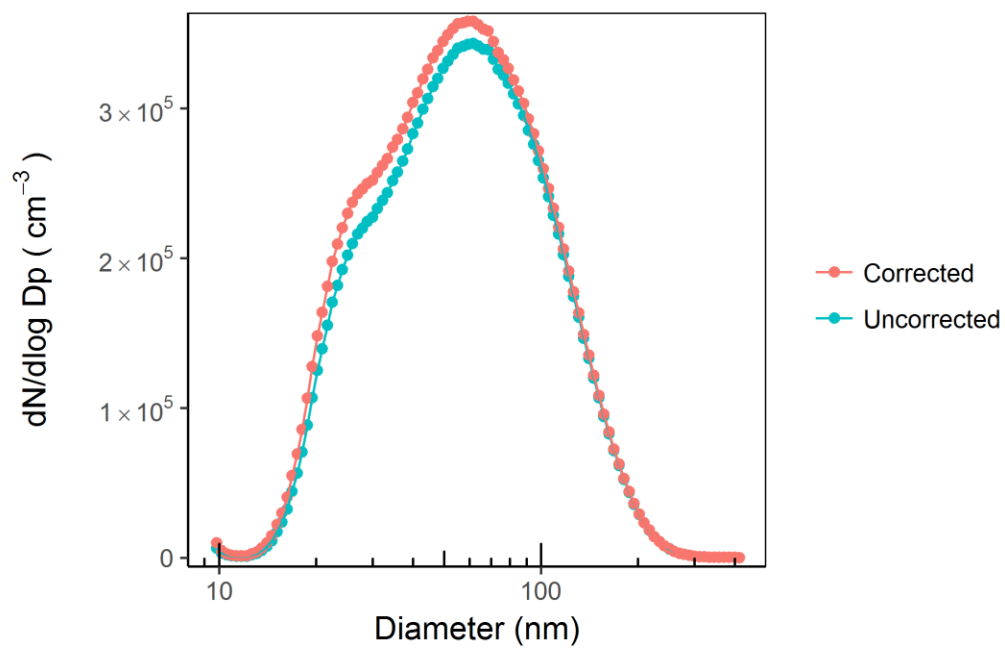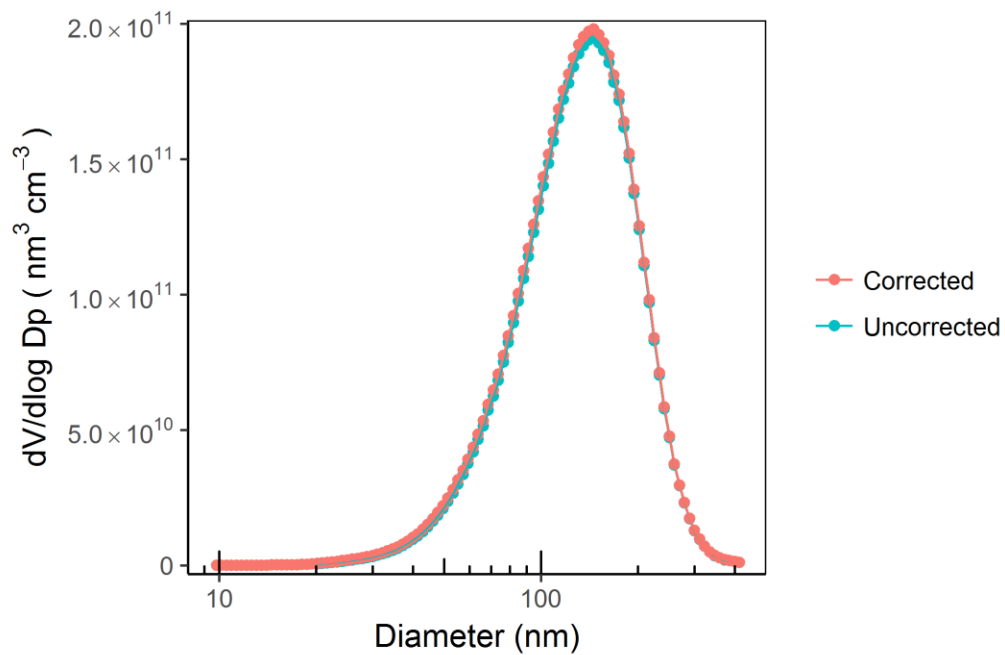

Figure S7: Continued

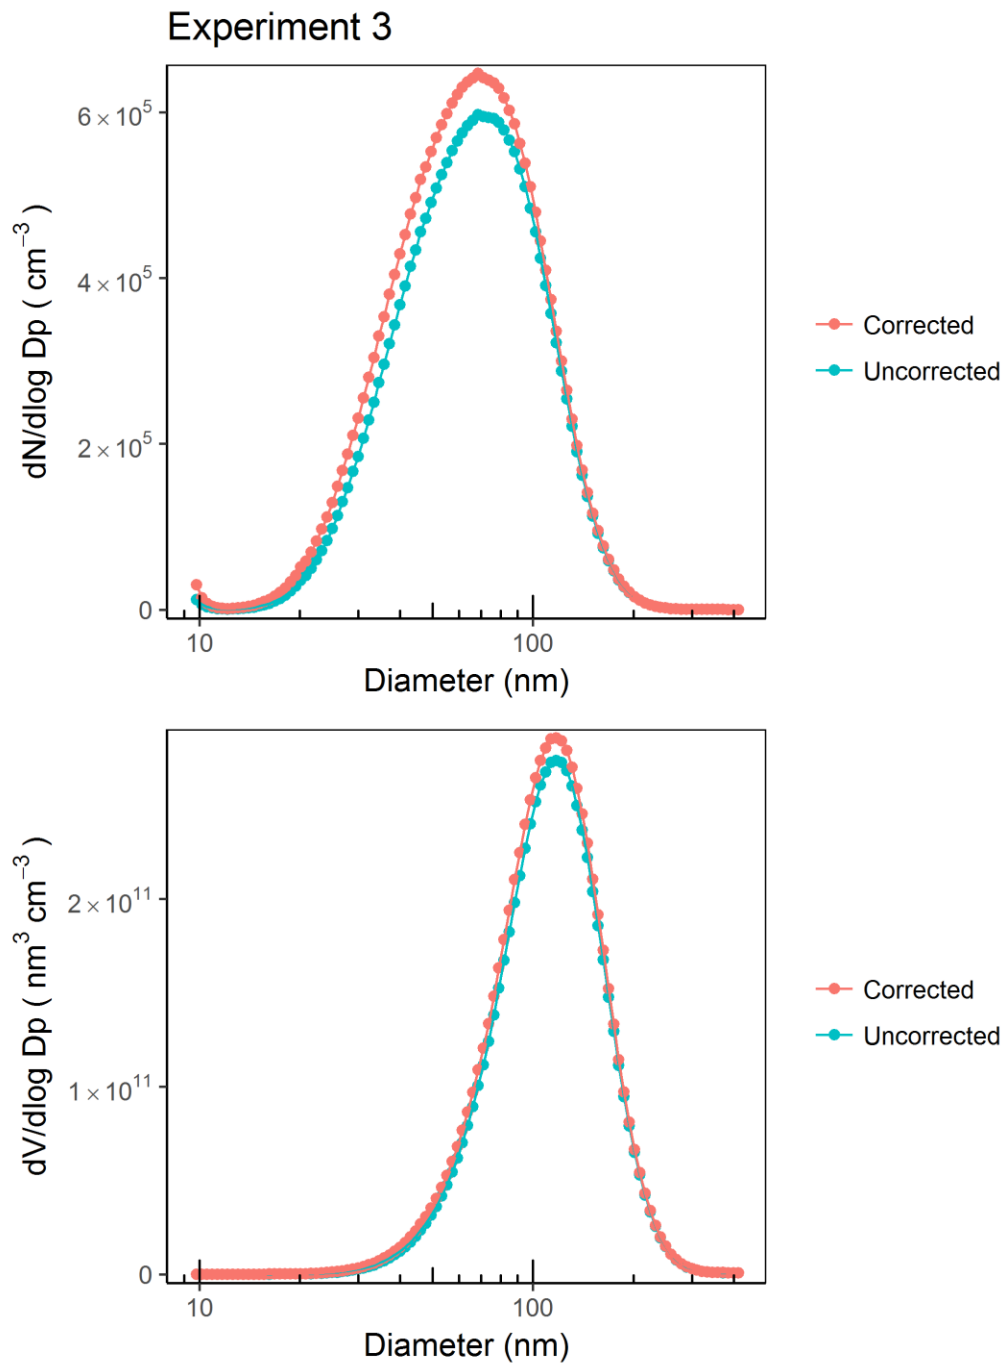

**Figure S7:** Continued

### Experiment 4

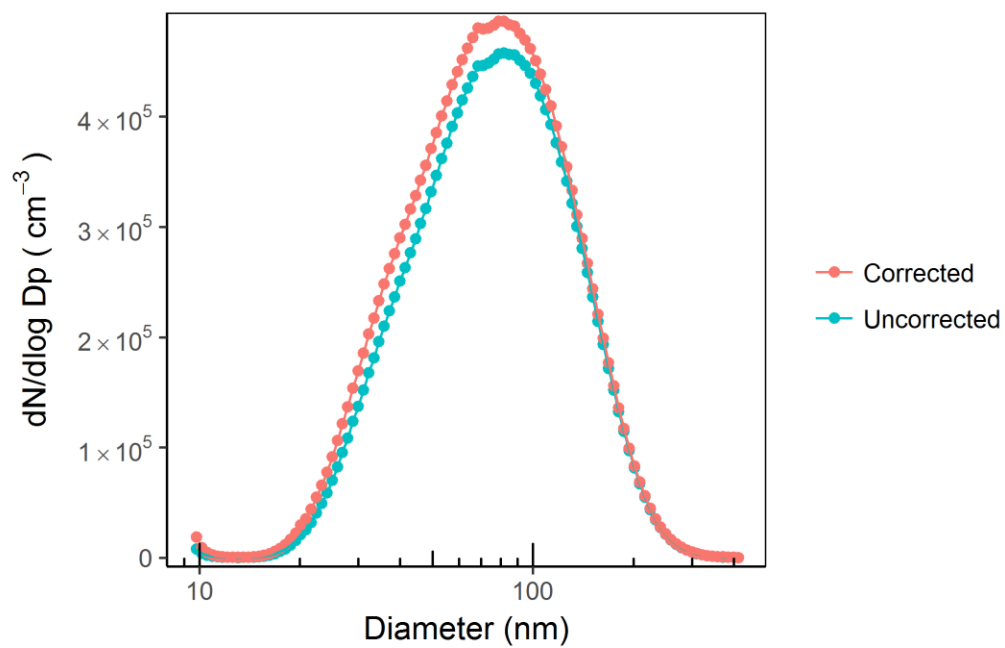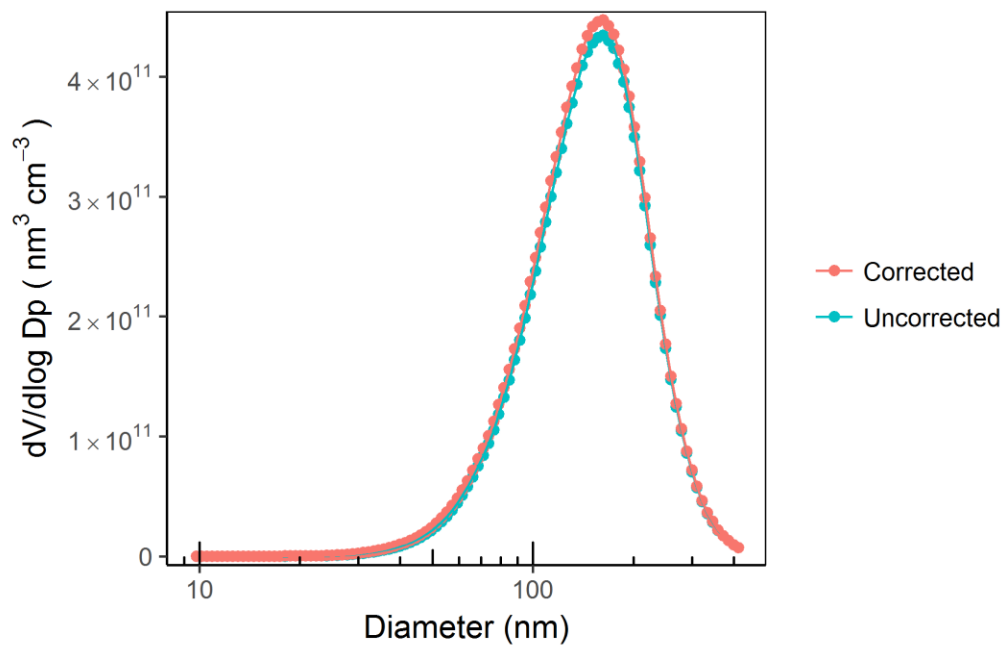

Figure S7: Continued

### Experiment 5

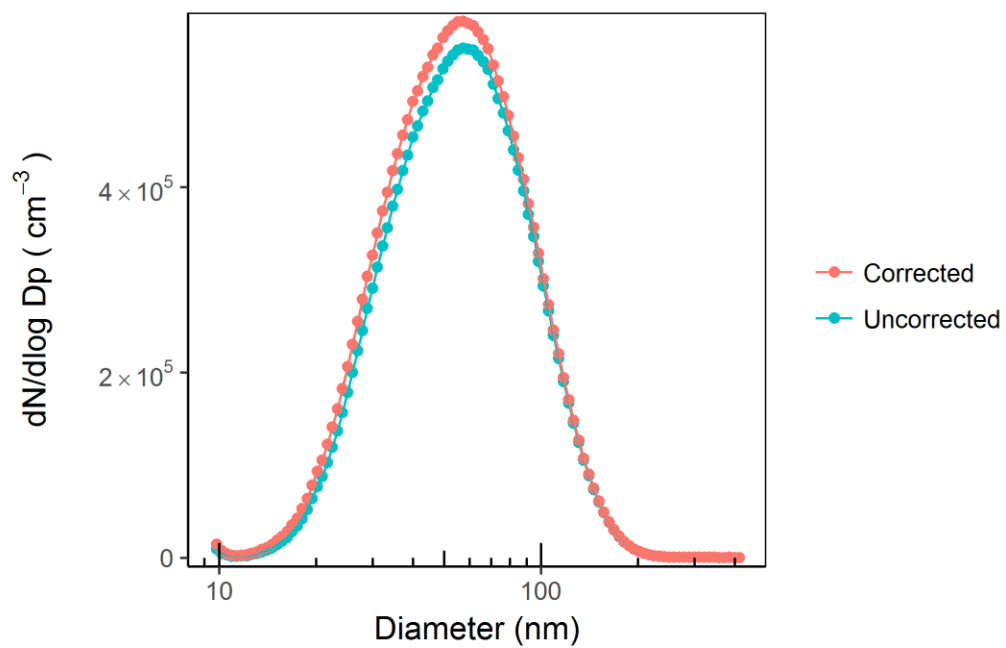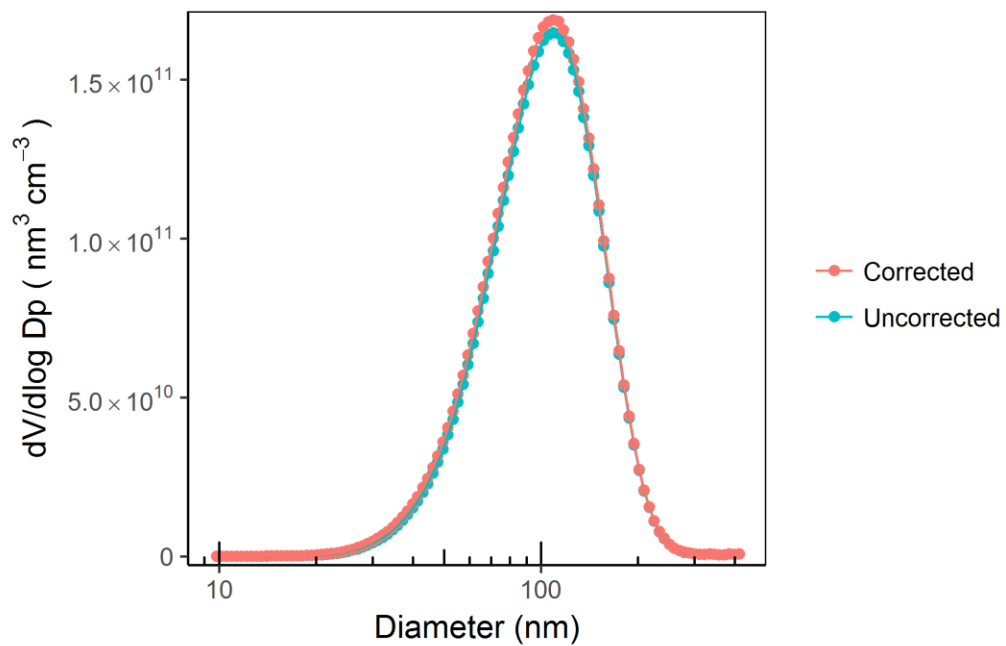

Figure S7: Continued

## Section S5: Yield sensitivity

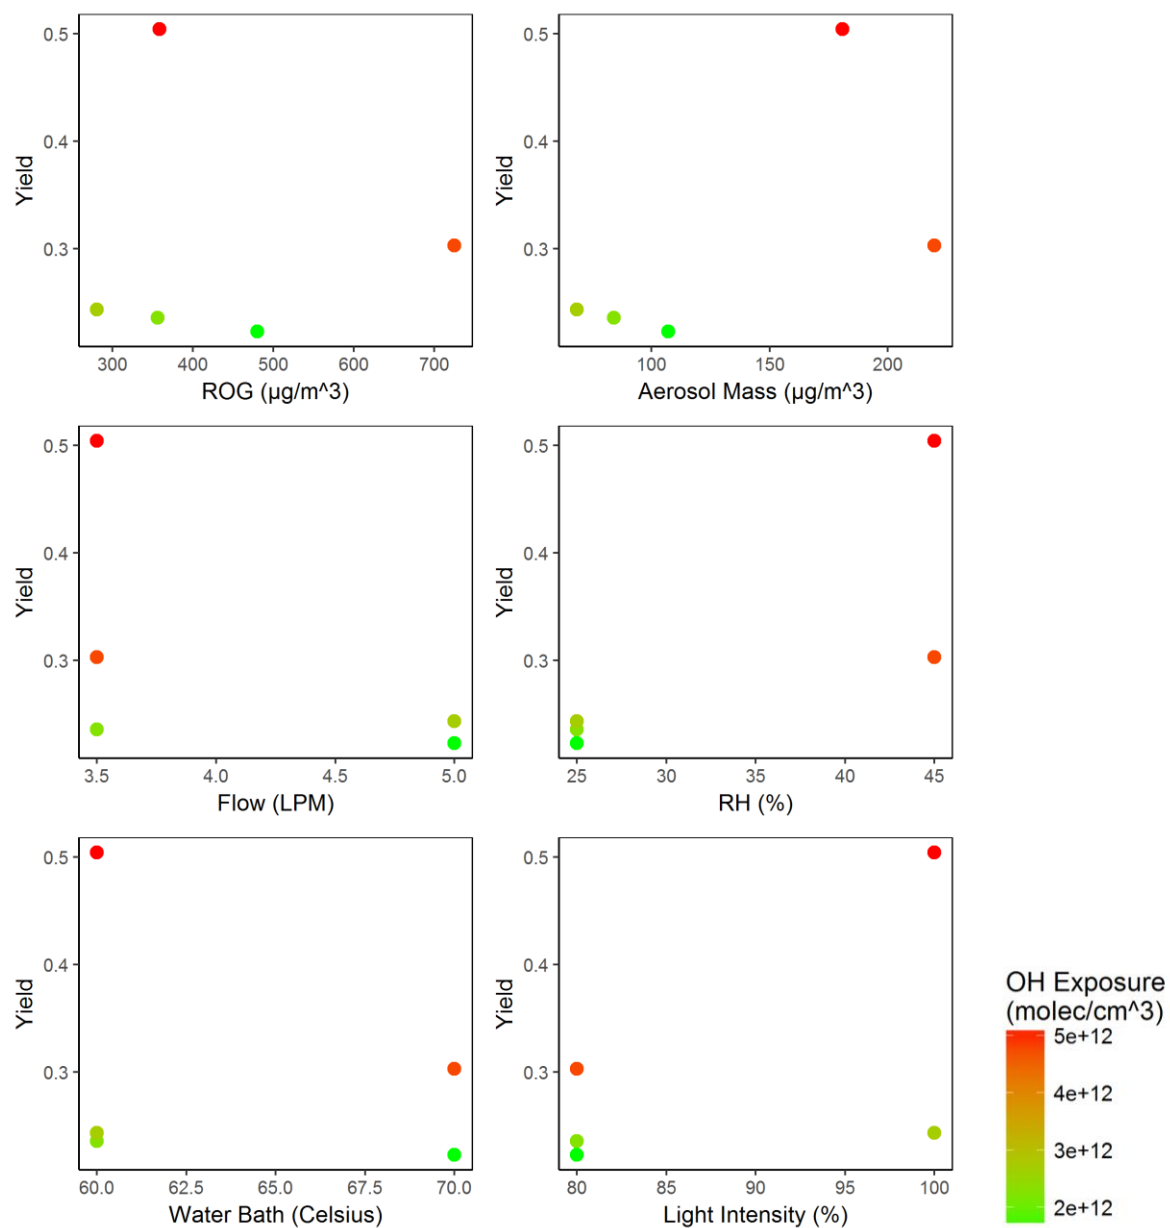

**Figure S8:** Measured D<sub>5</sub> oxidation aerosol yield as a function of system parameters. Data points are color coded according to OH exposure.



## Section S6: Condensational sink input

**Table S5:** Calculated condensational sink (CS) calculations used for LVOC modeling (Sect. 3.2.1). CS was calculated according to Palm et al. (2016) which recommends the average of the incoming and output OFR CS. For the yield experiments, the output D<sub>5</sub> oxidation aerosol number concentration was averaged with 0 particle incoming air.

| Experiment | Incoming Aerosol<br>(cm <sup>-3</sup> ) | Output Aerosol<br>(cm <sup>-3</sup> ) | CS<br>(m <sup>-2</sup> ) | CS rate<br>(s <sup>-1</sup> ) |
|------------|-----------------------------------------|---------------------------------------|--------------------------|-------------------------------|
| Yield 1    | 0                                       | 3.47E+05                              | 6619                     | 0.3860                        |
| Yield 2    | 0                                       | 2.57E+05                              | 3427                     | 0.1998                        |
| Yield 3    | 0                                       | 3.58E+05                              | 5173                     | 0.3017                        |
| Yield 4    | 0                                       | 3.07E+05                              | 5471                     | 0.3190                        |
| Yield 5    | 0                                       | 3.31E+05                              | 4035                     | 0.2353                        |

## Section S7: Hygroscopicity

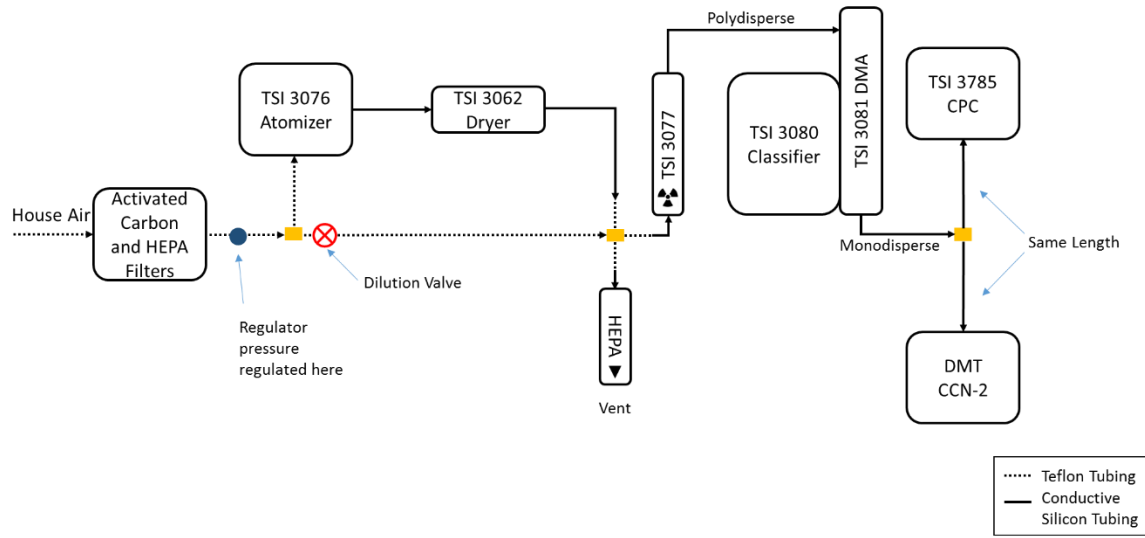

**Figure S9:** Ammoniums sulfate aerosol CCN testing flow diagram.

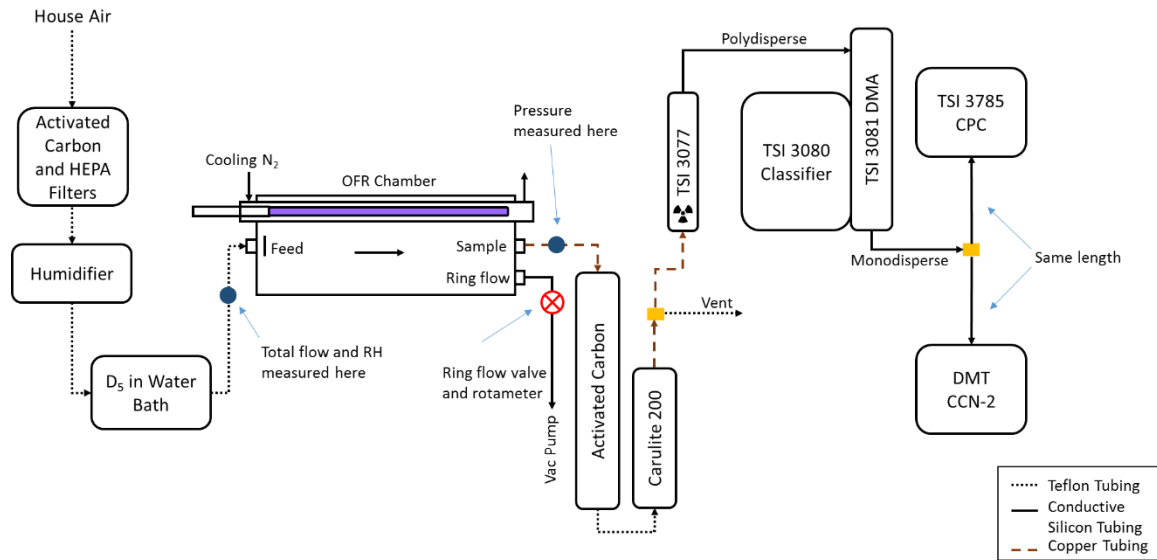

**Figure S10:** D<sub>5</sub> oxidation aerosol CCN testing flow diagram.

Two issues complicated CCN counter data analysis. First, temperature and flow spikes were observed that were caused by intermittent faults in a sample temperature sensor. This sensor was part of the instrument feedback control loop used to maintain the column thermal gradient, and accordingly these sensor faults upset the column thermal gradient and required some time to settle. Second, for some of the higher  $\Delta T$  set points, the temperatures were not able to reach the set points but were stable. To correct for these issues, scripts were developed to automatically classify data into stable (used in data analysis) and unstable (excluded) periods. Data were initially binned to 30 s intervals (raw CCN data was at 1 s, CPC data was at 5 s). For each 30 s period, temperature, flow, and pressure stability were calculated and compared to thresholds as described below; periods were then flagged as stable or unstable.

Four temperature tests were used: (i)  $\Delta T$  varied by no more than 0.16 K from the previous 10 s moving average; (ii) T1 (column low temperature) varied by no more than 0.20 K from the previous 10 s moving average; (iii) T3 (column high temperature) varied by no more than 0.20 K from the previous 10 s moving average; and (iv) that the 1 s values of  $\Delta T$  varied by no more than 0.37 K during the 30 s period. Pressure and flow were checked individually to make sure the relative percent difference between the current value and the 10 s moving average was lower than 4.5%. These data exclusion thresholds were selected by visual inspection of the data, but final data processing was automated. Failure of a single test in any 30 second period led to exclusion from analysis. For periods compliant with these tests (70%), average CCN and CPC concentration were calculated along with the average  $\Delta T$ .

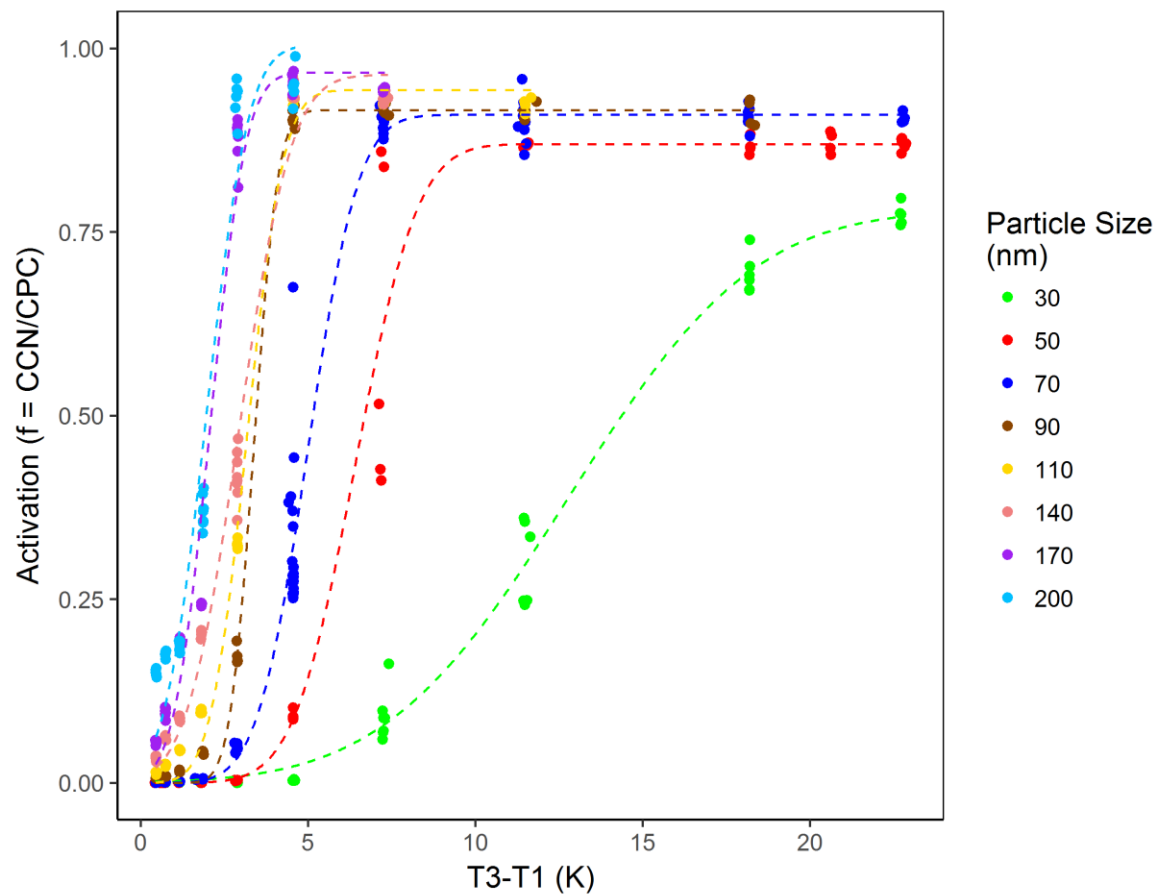

**Figure S11:** Uncorrected ammonium sulfate aerosol CCN activation curve used for calibration of the CCN counter supersaturation. Each point represents an average 30 s CCN/CPC measurement.

The AP3 Kohler model was used to relate ammonium sulfate particle diameter to critical supersaturation. The AP3 Kohler model is detailed in Rose et al. (2008). The critical supersaturation is found by writing all equations in terms of the unknown solute mass fraction ( $x_s$ ) and finding the peak of the resultant Kohler curve.

AP3 Model Parameterization:

1.  $\mu_s = \frac{x_s}{M_s(1-x_s)}$
2.  $a_w$  is found using a lookup table from the AIM inorganic model of  $a_w$  vs  $\mu_s$  data. The AIM data was run using the web interface for 299.8 K (Clegg et al., 1998; Clegg et al.). The temperature 299.8 K is the average T1 column temperature of the experiments. The T1 temperature was suggested by Rose et al. (2008) since activation is assumed to occur in the first half of the column and the T1 temperature represents the lower bound for the effective column temperature. Linear interpolation was used for the resulting lookup table.

$$3. \rho_w = \frac{A_0 + A_1 * t + A_2 * t^2 + A_3 * t^3 + A_4 * t^4 + A_5 * t^5}{1 + B_t}$$

$$t = T - 273.15 \text{ K}$$

Coefficients are found in Rose et al. (2008) Table A.4

$$4. \rho_{sol} = \rho_w + \left[ [5.92 \times 10^{-3} * (100 * x_s)^1] + [-5.036 \times 10^{-6} * (100 * x_s)^2] + [1.024 \times 10^{-8} * (100 * x_s)^3] \right] * 1000$$

$$5. g_s = \left( \frac{\rho_s}{x_s * \rho_{sol}} \right)^{1/3}$$

$$\rho_s = 1770 \text{ kg m}^{-3} \text{ for } (\text{NH}_4)_2\text{SO}_4$$

$$6. \sigma_w = 0.0761 - 1.55 \times 10^{-4} * (T - 273 \text{ K})$$

$$7. \sigma_{sol} = \sigma_w + (2.17 \times 10^{-3} * c_s)$$

$$8. c_s = \frac{x_s * \rho_{sol}}{M_s * 1000}$$

$$9. s = a_w e^{\left( \frac{4 * \sigma_{sol} * M_w}{\rho_w * R * T * g_s * D_s} \right)}$$

Defined variables:

$\mu_s$  = molality of solute ( $\text{mol kg}^{-1}$ )

$x_s$  = solute mass fraction

$M_s$  = molar mass of solute ( $0.1321395 \text{ kg mol}^{-1}$ )

$a_w$  = activity of water

$\rho_{sol}$  = density of solution ( $\text{kg m}^{-3}$ )

$\rho_w$  = density of pure water ( $\text{kg m}^{-3}$ )

$g_s$  = particle growth factor

$\sigma_{sol}$  = surface tension of solution ( $\text{N m}^{-1}$ )

$\sigma_w$  = surface tension of pure water ( $\text{N m}^{-1}$ )

$c_s$  = molarity of solute ( $\text{mol L}^{-1}$ )

$s$  = water vapor saturation ratio

$M_w$  = molar mass of water ( $0.0180153 \text{ kg mol}^{-1}$ )

$R$  = gas constant ( $\text{N m k}^{-1} \text{ mol}^{-1}$ )

$D_s$  = dry particle diameter (m)

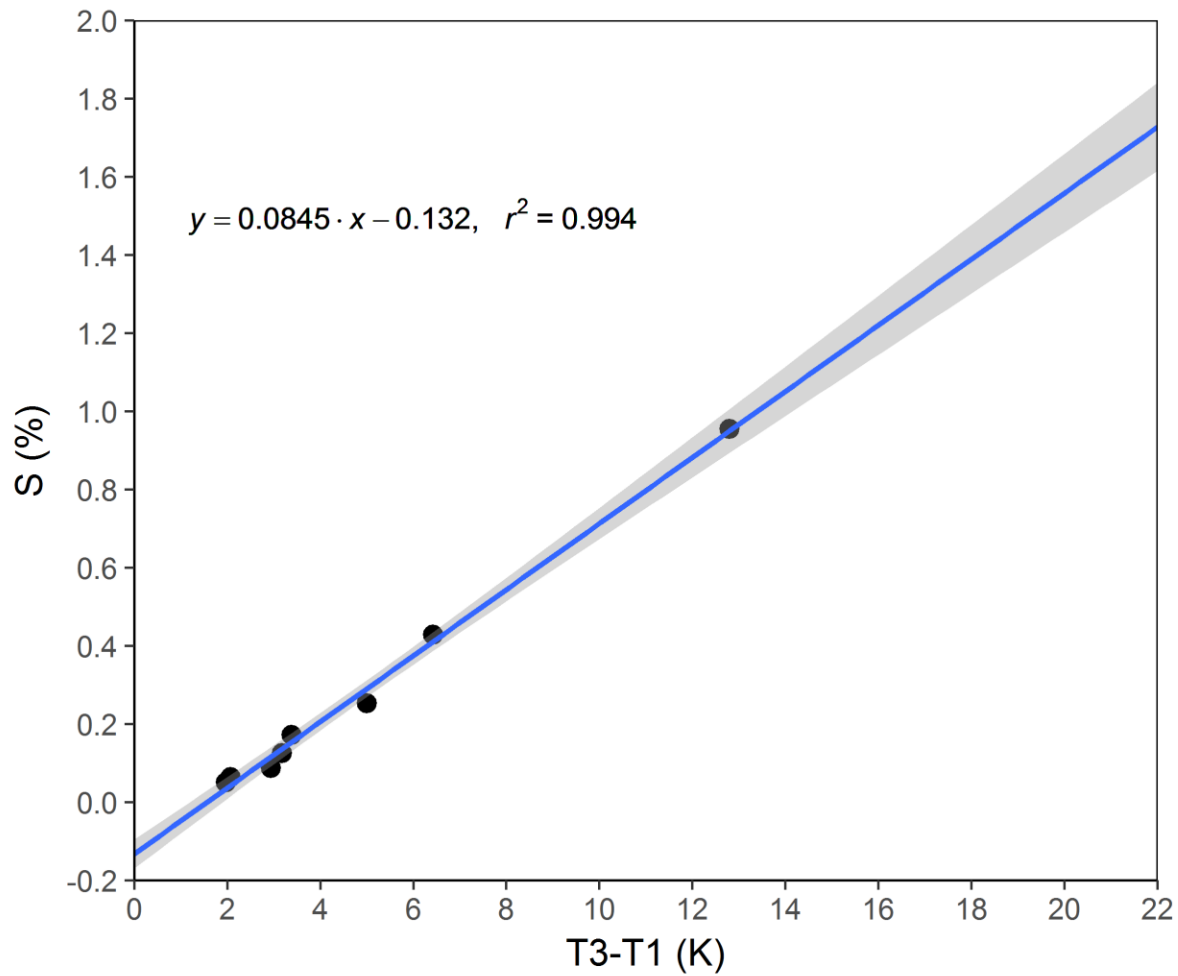

**Figure S12:** Supersaturation correlation to CCN counter  $\Delta T$  based on ammonium sulfate aerosol calibration. Supersaturation was calculated using the AP3 Kohler model detailed in Rose et al. (2008). The shaded region represents the 95% confidence interval.

**Table S6:** Calculated size resolved kappa values for ammonium sulfate and D<sub>5</sub> oxidation aerosols.

| Diameter (nm) | (NH <sub>4</sub> ) <sub>2</sub> SO <sub>4</sub> (polynomial fit) | (NH <sub>4</sub> ) <sub>2</sub> SO <sub>4</sub> (linear fit; 95% CI) | o-D <sub>5</sub> κ <sub>a</sub> (linear fit; 95% CI) | o-D <sub>5</sub> κ <sub>t</sub> (linear fit; 95% CI) |
|---------------|------------------------------------------------------------------|----------------------------------------------------------------------|------------------------------------------------------|------------------------------------------------------|
| 30            | 0.55                                                             | 0.56 (0.49 - 0.63)                                                   | -                                                    | -                                                    |
| 50            | 0.62                                                             | 0.64 (0.57 - 0.72)                                                   | -                                                    | -                                                    |
| 70            | 0.52                                                             | 0.47 (0.40 - 0.54)                                                   | 0.016 (0.014 - 0.020)                                | 0.0056 (0.0042 - 0.0073)                             |
| 90            | 0.97                                                             | 0.78 (0.59 - 1.09)                                                   | 0.010 (0.0084 - 0.012)                               | 0.0056 (0.0044 - 0.0071)                             |
| 110           | 0.66                                                             | 0.54 (0.39 - 0.80)                                                   | 0.012 (0.0099 - 0.014)                               | 0.0060 (0.0049 - 0.0074)                             |
| 140           | 0.42                                                             | 0.36 (0.25 - 0.58)                                                   | 0.0093 (0.0080 - 0.011)                              | 0.0079 (0.0067 - 0.0093)                             |
| 170           | 0.76                                                             | 1.49 (0.55 - 11.4)                                                   | 0.010 (0.0085 - 0.011)                               | 0.0078 (0.0067 - 0.0091)                             |
| 200           | 0.55                                                             | 1.45 (0.44 - 43.4)                                                   | 0.0068 (0.0058 - 0.0079)                             | 0.0063 (0.0054 - 0.0073)                             |
| Average       | 0.63                                                             | 0.79 (0.46 - 7.40)                                                   | 0.011 (0.0091 - 0.013)                               | 0.0065 (0.0054 - 0.0079)                             |

Using a third order polynomial fit rather than the linear fit results in improved correlation for low supersaturations and a resulting average ammonium sulfate kappa of 0.63 which is in close agreement with the previously reported value of 0.61 (Petters and Kreidenweis, 2007). We use the linear fit however for the cVMS data due to improved performance at high supersaturations.

## Section S8: Volatility

**Table S7:** Summary of V-TDMA analyzed results. Values represent the average of all trials for the selected particle size and temperature.  $D_p$  Bypass (all temps) is the average bypass particle size for all temperature settings of a particular particle size.

| T Set (°C) | $D_p$ Set (nm) | T (°C) | $D_p$ Bypass (nm) | $D_p$ Heated (nm) | $D_p$ Bypass (all temps) (nm) | Bypass Number (cm <sup>-3</sup> ) | Heated Number (cm <sup>-3</sup> ) | Bypass Mass (µg m <sup>-3</sup> ) | Heated Mass (µg m <sup>-3</sup> ) | Heated Trials | Bypass Trials | Diameter Change (%) | Number Change (%) |
|------------|----------------|--------|-------------------|-------------------|-------------------------------|-----------------------------------|-----------------------------------|-----------------------------------|-----------------------------------|---------------|---------------|---------------------|-------------------|
| 50         | 10             | 50.1   | 12.76             | 11.24             | 12.38                         | 922                               | 1288                              | 0.00130                           | 0.00121                           | 2             | 2             | -9.19               | 39.7              |
| 80         | 10             | 80.2   | 12.59             | 9.056             | 12.38                         | 1044                              | 556                               | 0.00132                           | 0.00196                           | 4             | 2             | -26.9               | -46.8             |
| 110        | 10             | 110.4  | 14.71             | 10.96             | 12.38                         | 1703                              | 628                               | 0.00291                           | 0.000960                          | 4             | 2             | -11.5               | -63.1             |
| 150        | 10             | 149.6  | 10.45             | 11.36             | 12.38                         | 1753                              | 544                               | 0.00218                           | 0.000656                          | 3             | 3             | -8.23               | -69.0             |
| 190        | 10             | 191.4  | -                 | 9.040             | 12.38                         | -                                 | 119                               | -                                 | 0.000139                          | 2             | 0             | -27.0               | -                 |
| 50         | 20             | 49.8   | 20.75             | 20.45             | 20.68                         | 37848                             | 40177                             | 0.169                             | 0.175                             | 3             | 1             | -1.10               | 6.15              |
| 80         | 20             | 80.0   | 20.64             | 20.30             | 20.68                         | 34577                             | 36096                             | 0.153                             | 0.150                             | 4             | 2             | -1.81               | 4.39              |
| 110        | 20             | 109.8  | 20.68             | 20.18             | 20.68                         | 35122                             | 35217                             | 0.156                             | 0.141                             | 4             | 2             | -2.39               | 0.27              |
| 150        | 20             | 150.9  | 20.64             | 19.92             | 20.68                         | 37235                             | 30917                             | 0.166                             | 0.113                             | 3             | 2             | -3.68               | -17.0             |
| 190        | 20             | 189.4  | 20.75             | 19.79             | 20.68                         | 39831                             | 26877                             | 0.176                             | 0.0911                            | 2             | 1             | -4.29               | -32.5             |
| 50         | 30             | 50.0   | 30.14             | 30.05             | 30.19                         | 70981                             | 81449                             | 1.00                              | 1.14                              | 2             | 1             | -0.47               | 14.7              |
| 80         | 30             | 80.3   | 30.18             | 29.87             | 30.19                         | 75440                             | 78321                             | 1.07                              | 1.06                              | 4             | 2             | -1.07               | 3.82              |
| 110        | 30             | 110.5  | 30.19             | 29.52             | 30.19                         | 72643                             | 70515                             | 1.02                              | 0.911                             | 4             | 2             | -2.25               | -2.93             |
| 150        | 30             | 149.9  | 30.19             | 29.18             | 30.19                         | 74929                             | 68995                             | 1.06                              | 0.840                             | 4             | 2             | -3.37               | -7.92             |
| 190        | 30             | 189.8  | 30.30             | 28.89             | 30.19                         | 69580                             | 61425                             | 0.994                             | 0.686                             | 2             | 1             | -4.32               | -11.7             |
| 50         | 50             | 50.0   | 49.85             | 49.63             | 49.89                         | 70528                             | 69382                             | 4.54                              | 4.42                              | 2             | 1             | -0.53               | -1.63             |
| 80         | 50             | 80.1   | 49.96             | 49.37             | 49.89                         | 67418                             | 68649                             | 4.36                              | 4.20                              | 4             | 2             | -1.04               | 1.83              |
| 110        | 50             | 110.1  | 49.85             | 48.94             | 49.89                         | 69197                             | 66893                             | 4.45                              | 3.96                              | 4             | 2             | -1.91               | -3.33             |
| 150        | 50             | 150.2  | 49.75             | 48.84             | 49.89                         | 63422                             | 65996                             | 4.06                              | 3.72                              | 4             | 2             | -2.10               | 4.06              |
| 190        | 50             | 191.1  | 50.16             | 48.29             | 49.89                         | 70161                             | 60349                             | 4.58                              | 3.19                              | 2             | 1             | -3.21               | -14.0             |
| 50         | 80             | 50.1   | 80.28             | 79.87             | 80.14                         | 46485                             | 48112                             | 12.6                              | 12.8                              | 3             | 1             | -0.34               | 3.50              |
| 80         | 80             | 80.3   | 80.08             | 79.44             | 80.14                         | 47606                             | 46148                             | 12.9                              | 12.0                              | 4             | 2             | -0.88               | -3.06             |
| 110        | 80             | 110.0  | 80.16             | 79.09             | 80.14                         | 45690                             | 44591                             | 12.4                              | 11.4                              | 4             | 2             | -1.32               | -2.41             |
| 150        | 80             | 150.7  | 80.07             | 78.34             | 80.14                         | 44614                             | 43540                             | 12.0                              | 10.6                              | 3             | 2             | -2.26               | -2.41             |
| 190        | 80             | 189.1  | 80.25             | 77.79             | 80.14                         | 42705                             | 39579                             | 11.5                              | 9.38                              | 2             | 1             | -2.94               | -7.32             |
| 50         | 110            | 50.2   | 110.2             | 109.7             | 110.1                         | 24992                             | 23295                             | 17.7                              | 16.2                              | 3             | 12            | -0.40               | -6.79             |
| 80         | 110            | 80.1   | 110.1             | 109.3             | 110.1                         | 23384                             | 23653                             | 16.5                              | 16.3                              | 4             | 2             | -0.72               | 1.15              |
| 110        | 110            | 110.6  | 110.1             | 108.6             | 110.1                         | 25163                             | 22110                             | 17.7                              | 14.9                              | 4             | 2             | -1.39               | -12.1             |
| 150        | 110            | 149.4  | 110.0             | 108.1             | 110.1                         | 23160                             | 22130                             | 16.3                              | 14.7                              | 3             | 3             | -1.83               | -4.45             |
| 190        | 110            | 190.5  | 109.9             | 107.9             | 110.1                         | 20968                             | 19948                             | 14.8                              | 12.9                              | 2             | 1             | -2.00               | -4.86             |



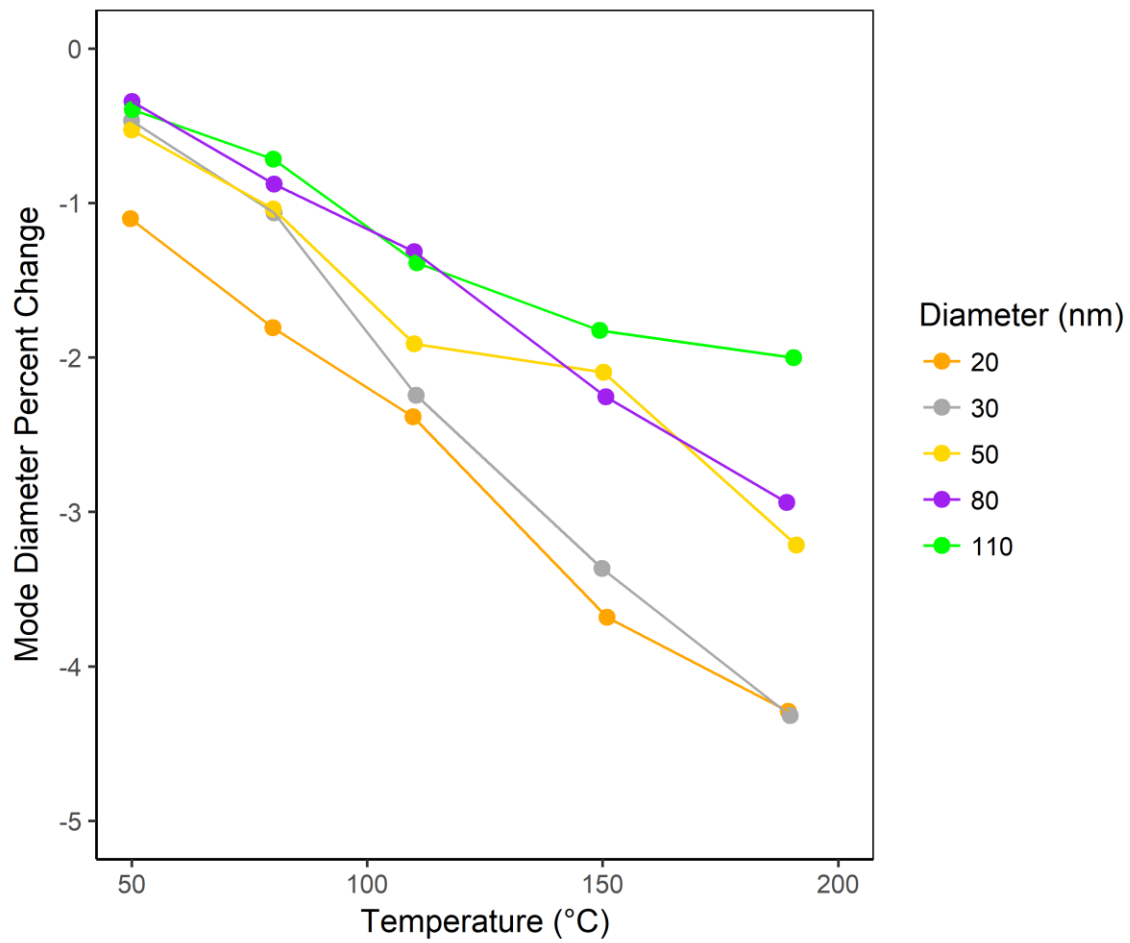

**Figure S13:** D<sub>5</sub> oxidation aerosol change in mode diameter after exposure to heated conditions in the V-TDMA experiments.

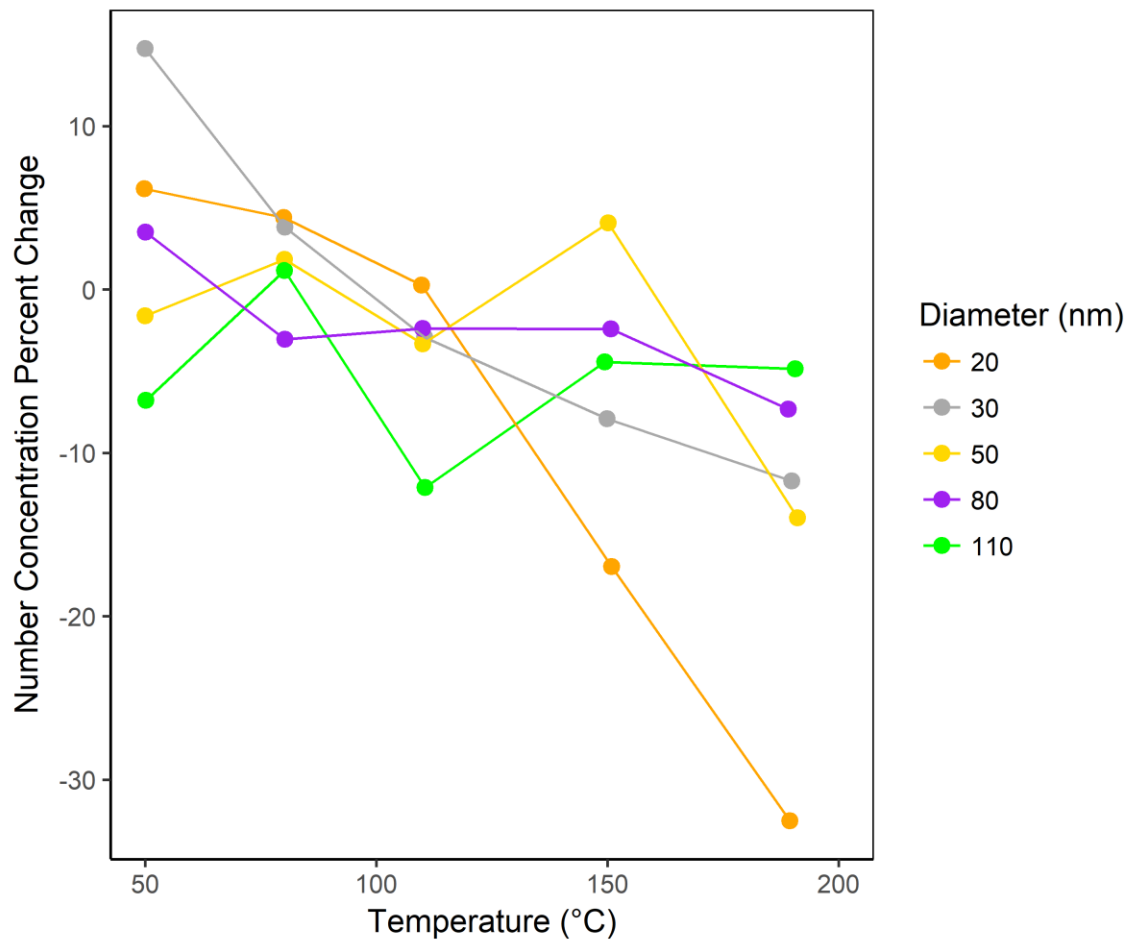

**Figure S14:** D<sub>5</sub> oxidation aerosol change in number concentration after exposure to heated conditions in the V-TDMA experiments.

## References

Extended AIM Aerosol Thermodynamics Model: <http://www.aim.env.uea.ac.uk/aim/aim.php>, access: November 2017.

Clegg, S. L., Brimblecombe, P., and Wexler, A. S.: Thermodynamic Model of the System  $\text{H}^+ - \text{NH}_4^+ - \text{SO}_4^{2-} - \text{NO}_3^- - \text{H}_2\text{O}$  at Tropospheric Temperatures, *The Journal of Physical Chemistry A*, 102, 2137-2154, doi:10.1021/jp973042r, 1998.

Palm, B. B., Campuzano-Jost, P., Ortega, A. M., Day, D. A., Kaser, L., Jud, W., Karl, T., Hansel, A., Hunter, J. F., Cross, E. S., Kroll, J. H., Peng, Z., Brune, W. H., and Jimenez, J. L.: In situ secondary organic aerosol formation from ambient pine forest air using an oxidation flow reactor, *Atmos. Chem. Phys.*, 16, 2943-2970, doi:10.5194/acp-16-2943-2016, 2016.

Petters, M. D., and Kreidenweis, S. M.: A single parameter representation of hygroscopic growth and cloud condensation nucleus activity, *Atmos. Chem. Phys.*, 7, 1961-1971, doi:10.5194/acp-7-1961-2007, 2007.

Rose, D., Gunthe, S. S., Mikhailov, E., Frank, G. P., Dusek, U., Andreae, M. O., and Pöschl, U.: Calibration and measurement uncertainties of a continuous-flow cloud condensation nuclei counter (DMT-CCNC): CCN activation of ammonium sulfate and sodium chloride aerosol particles in theory and experiment, *Atmos. Chem. Phys.*, 8, 1153-1179, doi:10.5194/acp-8-1153-2008, 2008.
